# Supplementary material
Source: Elsevier journal article supplement (https://comptes-rendus.academie-sciences.fr/chimie/article/10.1016/j.crci.2011.09.010/file/attach/mmc1.pdf)

# checkCIF/PLATON report

You have not supplied any structure factors. As a result the full set of tests cannot be run.

No syntax errors found.      CIF dictionary      Interpreting this report

## Datablock: Compound5

---

Bond precision:    C-C = 0.0074 A                      Wavelength=0.71073

Cell:              a=8.5661(3)              b=8.8903(3)              c=11.3000(5)  
                    alpha=90.216(1)          beta=103.867(1)          gamma=101.928(3)

Temperature:      173 K

|                        | Calculated           | Reported               |
|------------------------|----------------------|------------------------|
| Volume                 | 816.15(5)            | 816.15(5)              |
| Space group            | P -1                 | P -1                   |
| Hall group             | -P 1                 | ?                      |
| Moiety formula         | C15 H15 Au Cl N2 P S | C15 H15 Au1 Cl1 N2 P S |
| Sum formula            | C15 H15 Au Cl N2 P S | C15 H15 Au1 Cl1 N2 P S |
| Mr                     | 518.75               | 518.74                 |
| Dx,g cm <sup>-3</sup>  | 2.111                | 2.111                  |
| Z                      | 2                    | 2                      |
| Mu (mm <sup>-1</sup> ) | 9.396                | 9.396                  |
| F000                   | 492.0                | 492.0                  |
| F000'                  | 489.06               |                        |
| h,k,lmax               | 11,11,14             | 11,11,14               |
| Nref                   | 3938                 | 3937                   |
| Tmin,Tmax              | 0.406,0.391          | 0.453,0.453            |
| Tmin'                  | 0.376                |                        |

Correction method= NONE

Data completeness= 1.000                      Theta(max)= 28.000

R(reflections)= 0.0309( 3368)              wR2(reflections)= 0.0652( 3937)

S = 1.031                                      Npar= 194

---

The following ALERTS were generated. Each ALERT has the format

**test-name\_ALERT\_alert-type\_alert-level.**

Click on the hyperlinks for more details of the test.

---

### Alert level C

ABSTY03\_ALERT\_1\_C The `_exptl_absorpt_correction_type` has been given as none.

However values have been given for Tmin and Tmax. Remove these if an absorption correction has not been applied.

From the CIF: `_exptl_absorpt_correction_T_min` 0.453

From the CIF: \_exptl\_absorpt\_correction\_T\_max 0.453  
PLAT352\_ALERT\_3\_C Short N-H Bond (0.87A) N2 - H1N ... 0.76 Ang.

---

**Alert level G**

PLAT005\_ALERT\_5\_G No \_iucr\_refine\_instructions\_details in CIF .... ?

---

0 **ALERT level A** = Most likely a serious problem - resolve or explain  
0 **ALERT level B** = A potentially serious problem, consider carefully  
2 **ALERT level C** = Check. Ensure it is not caused by an omission or oversight  
1 **ALERT level G** = General information/check it is not something unexpected

1 ALERT type 1 CIF construction/syntax error, inconsistent or missing data  
0 ALERT type 2 Indicator that the structure model may be wrong or deficient  
1 ALERT type 3 Indicator that the structure quality may be low  
0 ALERT type 4 Improvement, methodology, query or suggestion  
1 ALERT type 5 Informative message, check

---

## Datablock: Compound6

---

Bond precision: C-C = 0.0162 A                      Wavelength=0.71073

Cell:                      a=12.7527(6)              b=8.6138(5)              c=18.7048(8)  
                            alpha=90                      beta=129.342(3)              gamma=90

Temperature:              173 K

|                | Calculated           | Reported             |
|----------------|----------------------|----------------------|
| Volume         | 1589.06(15)          | 1589.06(14)          |
| Space group    | P 21/c               | P 21/c               |
| Hall group     | -P 2ybc              | ?                    |
| Moiety formula | C15 H13 Au Cl N2 P S | C15 H13 Au Cl N2 P S |
| Sum formula    | C15 H13 Au Cl N2 P S | C15 H13 Au Cl N2 P S |
| Mr             | 516.73               | 516.72               |
| Dx,g cm-3      | 2.160                | 2.160                |
| Z              | 4                    | 4                    |
| Mu (mm-1)      | 9.651                | 9.651                |
| F000           | 976.0                | 976.0                |
| F000'          | 970.13               |                      |
| h,k,lmax       | 16,11,24             | 16,11,24             |
| Nref           | 3630                 | 3621                 |
| Tmin,Tmax      | 0.256,0.285          | 0.720,0.801          |
| Tmin'          | 0.216                |                      |

Correction method= MULTI-SCAN

Data completeness= 0.998                      Theta(max)= 27.480

R(reflections)= 0.0408( 2578)                      wR2(reflections)= 0.1282( 3621)

S = 1.078

Npar= 190

---

The following ALERTS were generated. Each ALERT has the format  
**test-name\_ALERT\_alert-type\_alert-level**.  
Click on the hyperlinks for more details of the test.

---

**Alert level C**

PLAT342\_ALERT\_3\_C Low Bond Precision on C-C Bonds ..... 0.0162 Ang

---

**Alert level G**

PLAT005\_ALERT\_5\_G No \_iucr\_refine\_instructions\_details in CIF .... ?

---

- 0 **ALERT level A** = Most likely a serious problem - resolve or explain  
0 **ALERT level B** = A potentially serious problem, consider carefully  
1 **ALERT level C** = Check. Ensure it is not caused by an omission or oversight  
1 **ALERT level G** = General information/check it is not something unexpected
- 0 ALERT type 1 CIF construction/syntax error, inconsistent or missing data  
0 ALERT type 2 Indicator that the structure model may be wrong or deficient  
1 ALERT type 3 Indicator that the structure quality may be low  
0 ALERT type 4 Improvement, methodology, query or suggestion  
1 ALERT type 5 Informative message, check
- 

## Datablock: Compound7

---

Bond precision: C-C = 0.0104 A

Wavelength=0.71073

Cell: a=11.9973(7) b=10.1616(3) c=18.9570(8)  
alpha=90 beta=125.438(3) gamma=90  
Temperature: 173 K

|                | Calculated           | Reported             |
|----------------|----------------------|----------------------|
| Volume         | 1882.94(16)          | 1882.94(15)          |
| Space group    | P 21/c               | P 21/c               |
| Hall group     | -P 2ybc              | ?                    |
| Moiety formula | C19 H15 Au Cl N2 P S | C19 H15 Au Cl N2 P S |
| Sum formula    | C19 H15 Au Cl N2 P S | C19 H15 Au Cl N2 P S |
| Mr             | 566.79               | 566.79               |
| Dx,g cm-3      | 1.999                | 1.999                |
| Z              | 4                    | 4                    |
| Mu (mm-1)      | 8.155                | 8.155                |
| F000           | 1080.0               | 1080.0               |
| F000'          | 1074.10              |                      |
| h,k,lmax       | 16,14,26             | 16,14,26             |
| Nref           | 5501                 | 5486                 |
| Tmin,Tmax      | 0.561,0.613          | 0.720,0.801          |
| Tmin'          | 0.516                |                      |

Correction method= MULTI-SCAN

Data completeness= 0.997

Theta(max)= 30.020

R(reflections)= 0.0359( 3762)

wR2(reflections)= 0.1097( 5486)

S = 1.016

Npar= 226

---

The following ALERTS were generated. Each ALERT has the format

**test-name\_ALERT\_alert-type\_alert-level.**

Click on the hyperlinks for more details of the test.

---

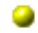

#### Alert level C

PLAT342\_ALERT\_3\_C Low Bond Precision on C-C Bonds ..... 0.0104 Ang  
PLAT790\_ALERT\_4\_C Centre of Gravity not Within Unit Cell: Resd. # 1  
C19 H15 Au Cl N2 P S

---

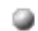

#### Alert level G

PLAT005\_ALERT\_5\_G No \_iucr\_refine\_instructions\_details in CIF .... ?

---

0 **ALERT level A** = Most likely a serious problem - resolve or explain  
0 **ALERT level B** = A potentially serious problem, consider carefully  
2 **ALERT level C** = Check. Ensure it is not caused by an omission or oversight  
1 **ALERT level G** = General information/check it is not something unexpected

0 ALERT type 1 CIF construction/syntax error, inconsistent or missing data  
0 ALERT type 2 Indicator that the structure model may be wrong or deficient  
1 ALERT type 3 Indicator that the structure quality may be low  
1 ALERT type 4 Improvement, methodology, query or suggestion  
1 ALERT type 5 Informative message, check

---

## Datablock: Compound8

---

Bond precision: C-C = 0.0177 A

Wavelength=0.71073

Cell: a=9.1049(3)

b=23.3032(8)

c=28.4310(11)

alpha=90

beta=90

gamma=90

Temperature: 173 K

|                | Calculated           | Reported             |
|----------------|----------------------|----------------------|
| Volume         | 6032.3(4)            | 6032.3(4)            |
| Space group    | F 2 d d              | F 2 d d              |
| Hall group     | F -2d 2              | ?                    |
| Moiety formula | C30 H28 Au2 N4 P2 S2 | C30 H28 Au2 N4 P2 S2 |
| Sum formula    | C30 H28 Au2 N4 P2 S2 | C30 H28 Au2 N4 P2 S2 |
| Mr             | 964.58               | 964.56               |
| Dx,g cm-3      | 2.124                | 2.124                |
| Z              | 8                    | 8                    |
| Mu (mm-1)      | 9.990                | 9.990                |
| F000           | 3648.0               | 3648.0               |
| F000'          | 3622.23              |                      |
| h,k,lmax       | 12,31,38             | 12,31,38             |
| Nref           | 2124[ 4008]          | 3236                 |
| Tmin,Tmax      | 0.105,0.136          | 0.133,0.159          |
| Tmin'          | 0.043                |                      |

Correction method= MULTI-SCAN

Data completeness= 1.52/0.81      Theta(max)= 28.990

R(reflections)= 0.0461( 2937)      wR2(reflections)= 0.1164( 3236)

S = 1.033      Npar= 181

The following ALERTS were generated. Each ALERT has the format  
**test-name\_ALERT\_alert-type\_alert-level**.  
Click on the hyperlinks for more details of the test.

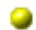

#### Alert level C

PLAT234\_ALERT\_4\_C Large Hirshfeld Difference C12 -- C13 .. 0.17 Ang.  
PLAT342\_ALERT\_3\_C Low Bond Precision on C-C Bonds ..... 0.0177 Ang  
PLAT790\_ALERT\_4\_C Centre of Gravity not Within Unit Cell: Resd. # 1  
C30 H28 Au2 N4 P2 S2

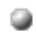

#### Alert level G

REFLT03\_ALERT\_4\_G Please check that the estimate of the number of Friedel pairs is correct. If it is not, please give the correct count in the \_publ\_section\_exptl\_refinement section of the submitted CIF.  
From the CIF: \_diffrn\_reflms\_theta\_max 28.99  
From the CIF: \_reflns\_number\_total 3236  
Count of symmetry unique reflns 2124  
Completeness (\_total/calc) 152.35%  
TEST3: Check Friedels for noncentro structure  
Estimate of Friedel pairs measured 1112  
Fraction of Friedel pairs measured 0.524  
Are heavy atom types Z>Si present yes  
PLAT005\_ALERT\_5\_G No \_iucr\_refine\_instructions\_details in CIF .... ?  
PLAT128\_ALERT\_4\_G Alternate Setting of Space-group Fdd2 ..... F2dd

0 **ALERT level A** = Most likely a serious problem - resolve or explain

0 **ALERT level B** = A potentially serious problem, consider carefully  
3 **ALERT level C** = Check. Ensure it is not caused by an omission or oversight  
3 **ALERT level G** = General information/check it is not something unexpected

0 ALERT type 1 CIF construction/syntax error, inconsistent or missing data  
0 ALERT type 2 Indicator that the structure model may be wrong or deficient  
1 ALERT type 3 Indicator that the structure quality may be low  
4 ALERT type 4 Improvement, methodology, query or suggestion  
1 ALERT type 5 Informative message, check

---

## Datablock: Compound9

---

Bond precision: C-C = 0.0126 A                      Wavelength=0.71073

Cell:                      a=16.4751(6)              b=11.3575(6)              c=18.0291(7)  
                            alpha=90                      beta=120.607(3)              gamma=90

Temperature:              173 K

|                        | Calculated           | Reported             |
|------------------------|----------------------|----------------------|
| Volume                 | 2903.5(2)            | 2903.5(2)            |
| Space group            | P 21/c               | P 21/c               |
| Hall group             | -P 2ybc              | ?                    |
| Moiety formula         | C30 H24 Au2 N4 P2 S2 | C30 H24 Au2 N4 P2 S2 |
| Sum formula            | C30 H24 Au2 N4 P2 S2 | C30 H24 Au2 N4 P2 S2 |
| Mr                     | 960.55               | 960.53               |
| Dx, g cm <sup>-3</sup> | 2.197                | 2.197                |
| Z                      | 4                    | 4                    |
| Mu (mm <sup>-1</sup> ) | 10.377               | 10.377               |
| F000                   | 1808.0               | 1808.0               |
| F000'                  | 1795.13              |                      |
| h,k,lmax               | 21,14,23             | 21,14,23             |
| Nref                   | 6928                 | 6906                 |
| Tmin,Tmax              | 0.384,0.436          | 0.720,0.783          |
| Tmin'                  | 0.341                |                      |

Correction method= MULTI-SCAN

Data completeness= 0.997                      Theta(max)= 27.880

R(reflections)= 0.0445( 4484)                      wR2(reflections)= 0.0787( 6906)

S = 0.964                      Npar= 361

---

The following ALERTS were generated. Each ALERT has the format  
**test-name\_ALERT\_alert-type\_alert-level**.  
Click on the hyperlinks for more details of the test.

---

 **Alert level C**

PLAT220\_ALERT\_2\_C Large Non-Solvent C Ueq(max)/Ueq(min) ... 3.3 Ratio  
PLAT342\_ALERT\_3\_C Low Bond Precision on C-C Bonds ..... 0.0126 Ang

---

**Alert level G**

PLAT005\_ALERT\_5\_G No \_iucr\_refine\_instructions\_details in CIF .... ?

---

0 **ALERT level A** = Most likely a serious problem - resolve or explain  
0 **ALERT level B** = A potentially serious problem, consider carefully  
2 **ALERT level C** = Check. Ensure it is not caused by an omission or oversight  
1 **ALERT level G** = General information/check it is not something unexpected

0 ALERT type 1 CIF construction/syntax error, inconsistent or missing data  
1 ALERT type 2 Indicator that the structure model may be wrong or deficient  
1 ALERT type 3 Indicator that the structure quality may be low  
0 ALERT type 4 Improvement, methodology, query or suggestion  
1 ALERT type 5 Informative message, check

---

## Datablock: Compound10

---

Bond precision: C-C = 0.0138 A Wavelength=0.71073

Cell: a=12.2324(4) b=17.0012(5) c=18.3825(5)  
alpha=77.8494(16) beta=72.2786(15) gamma=70.3212(15)

Temperature: 173 K

|                | Calculated           | Reported             |
|----------------|----------------------|----------------------|
| Volume         | 3403.90(18)          | 3403.90(18)          |
| Space group    | P -1                 | P -1                 |
| Hall group     | -P 1                 | ?                    |
| Moiety formula | C38 H28 Au2 N4 P2 S2 | C38 H28 Au2 N4 P2 S2 |
| Sum formula    | C38 H28 Au2 N4 P2 S2 | C38 H28 Au2 N4 P2 S2 |
| Mr             | 1060.67              | 1060.64              |
| Dx,g cm-3      | 2.070                | 2.070                |
| Z              | 4                    | 4                    |
| Mu (mm-1)      | 8.862                | 8.863                |
| F000           | 2016.0               | 2016.0               |
| F000'          | 2003.06              |                      |
| h,k,lmax       | 15,22,23             | 15,22,23             |
| Nref           | 15564                | 15530                |
| Tmin,Tmax      | 0.534,0.588          | 0.720,0.783          |
| Tmin'          | 0.487                |                      |

Correction method= MULTI-SCAN

Data completeness= 0.998 Theta(max)= 27.460

R(reflections)= 0.0406( 9925) wR2(reflections)= 0.1346( 15530)

---

The following ALERTS were generated. Each ALERT has the format  
**test-name\_ALERT\_alert-type\_alert-level**.  
 Click on the hyperlinks for more details of the test.

---

 **Alert level C**

PLAT342\_ALERT\_3\_C Low Bond Precision on C-C Bonds ..... 0.0138 Ang

---

 **Alert level G**

PLAT005\_ALERT\_5\_G No \_iucr\_refine\_instructions\_details in CIF .... ?

---

- 0 **ALERT level A** = Most likely a serious problem - resolve or explain  
 0 **ALERT level B** = A potentially serious problem, consider carefully  
 1 **ALERT level C** = Check. Ensure it is not caused by an omission or oversight  
 1 **ALERT level G** = General information/check it is not something unexpected
- 0 ALERT type 1 CIF construction/syntax error, inconsistent or missing data  
 0 ALERT type 2 Indicator that the structure model may be wrong or deficient  
 1 ALERT type 3 Indicator that the structure quality may be low  
 0 ALERT type 4 Improvement, methodology, query or suggestion  
 1 ALERT type 5 Informative message, check
- 

It is advisable to attempt to resolve as many as possible of the alerts in all categories. Often the minor alerts point to easily fixed oversights, errors and omissions in your CIF or refinement strategy, so attention to these fine details can be worthwhile. In order to resolve some of the more serious problems it may be necessary to carry out additional measurements or structure refinements. However, the purpose of your study may justify the reported deviations and the more serious of these should normally be commented upon in the discussion or experimental section of a paper or in the "special\_details" fields of the CIF. checkCIF was carefully designed to identify outliers and unusual parameters, but every test has its limitations and alerts that are not important in a particular case may appear. Conversely, the absence of alerts does not guarantee there are no aspects of the results needing attention. It is up to the individual to critically assess their own results and, if necessary, seek expert advice.

### **Publication of your CIF in IUCr journals**

A basic structural check has been run on your CIF. These basic checks will be run on all CIFs submitted for publication in IUCr journals (*Acta Crystallographica*, *Journal of Applied Crystallography*, *Journal of Synchrotron Radiation*); however, if you intend to submit to *Acta Crystallographica Section C* or *E*, you should make sure that full publication checks are run on the final version of your CIF prior to submission.

### **Publication of your CIF in other journals**

Please refer to the *Notes for Authors* of the relevant journal for any special instructions relating to CIF submission.





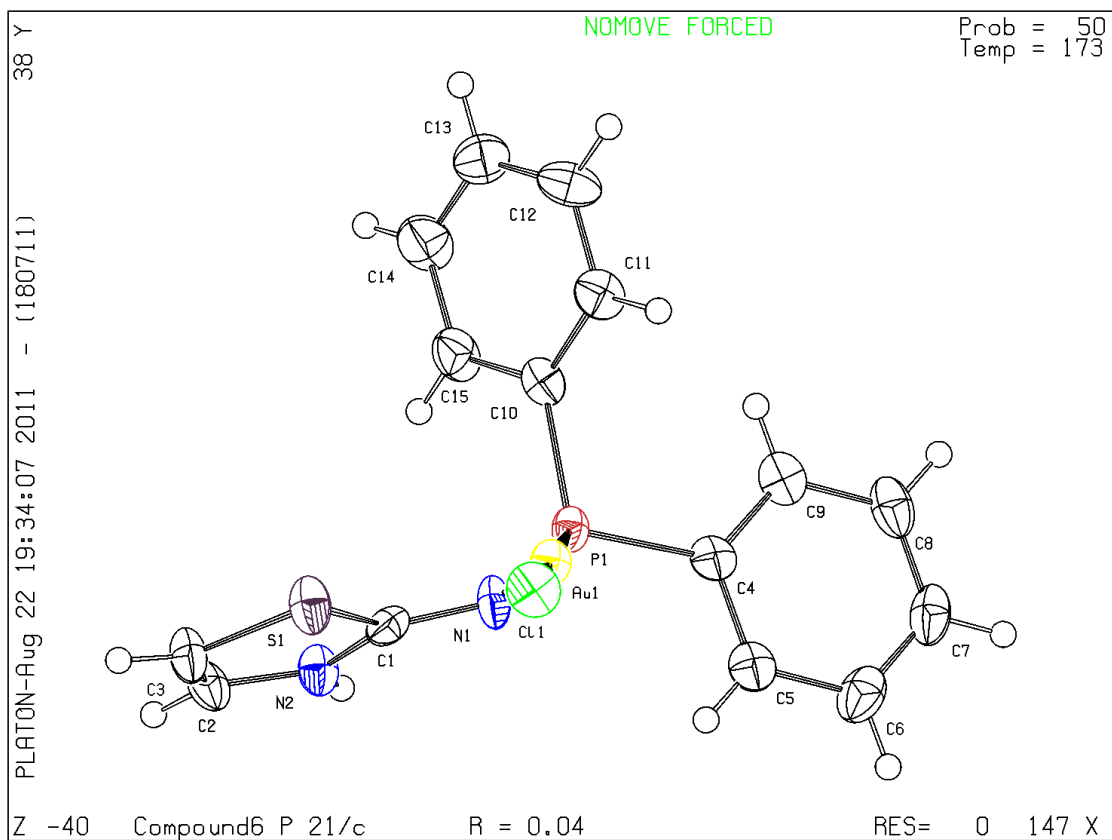

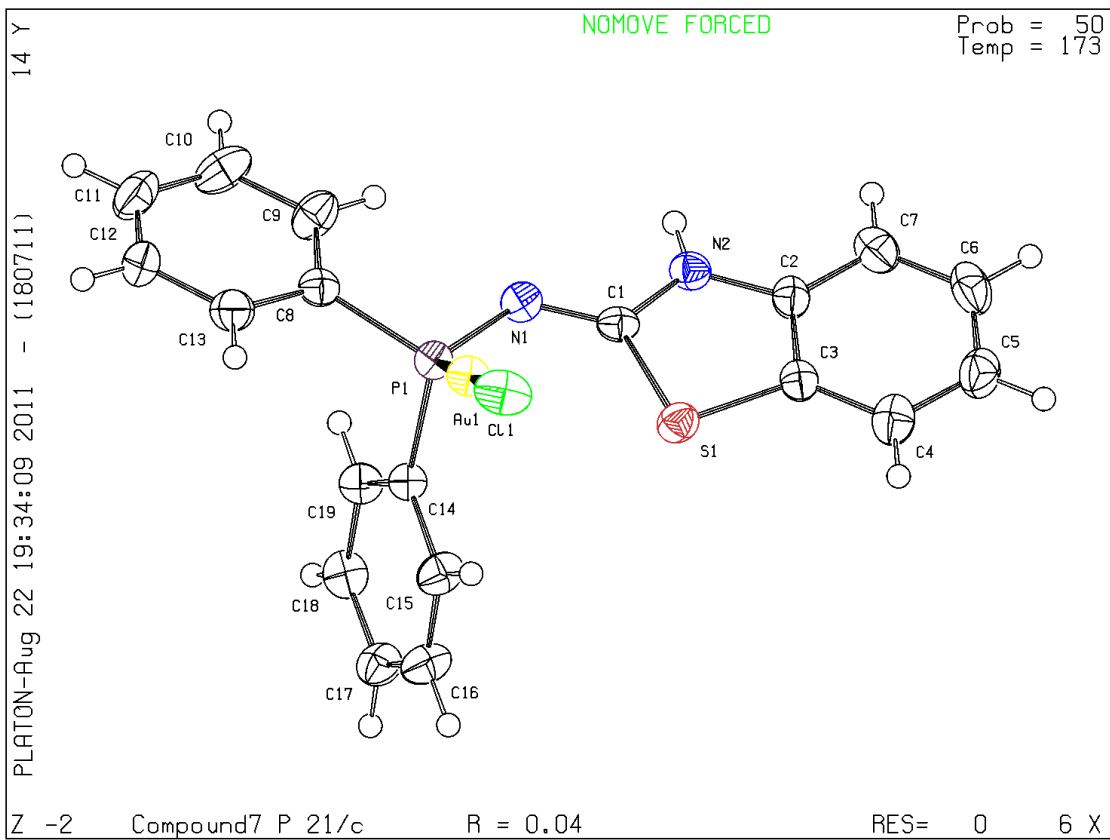

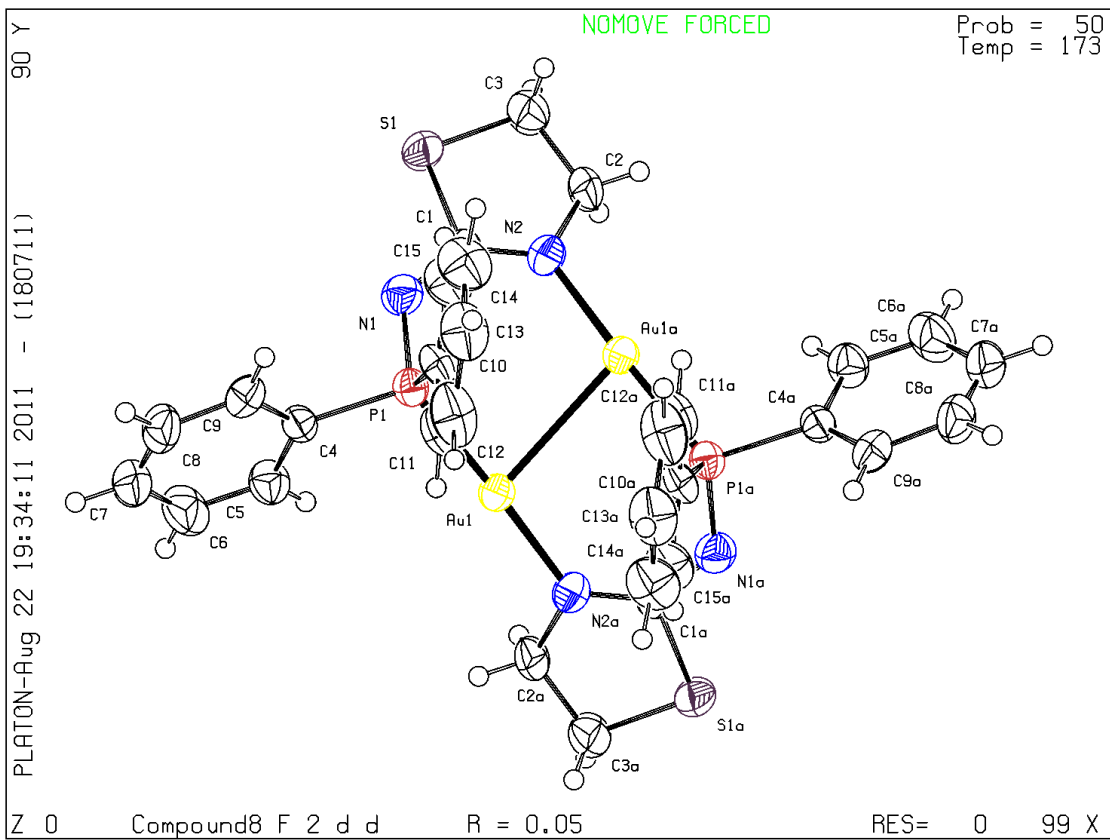

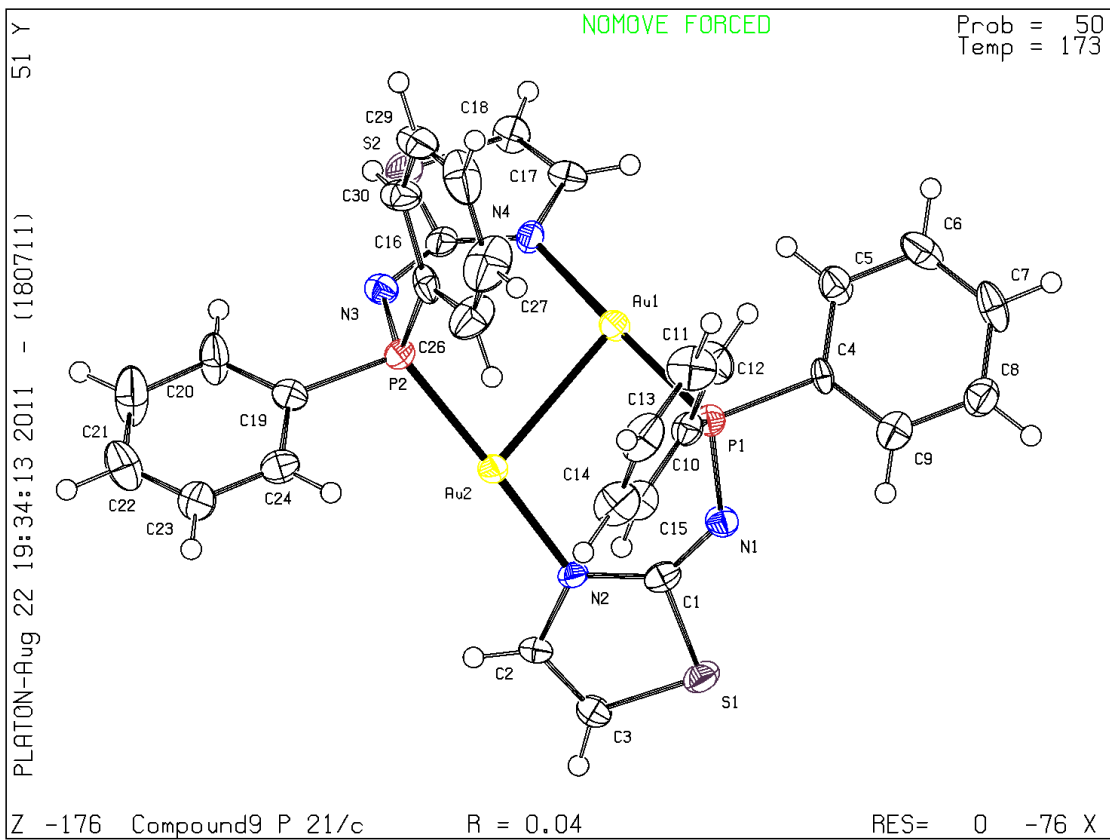

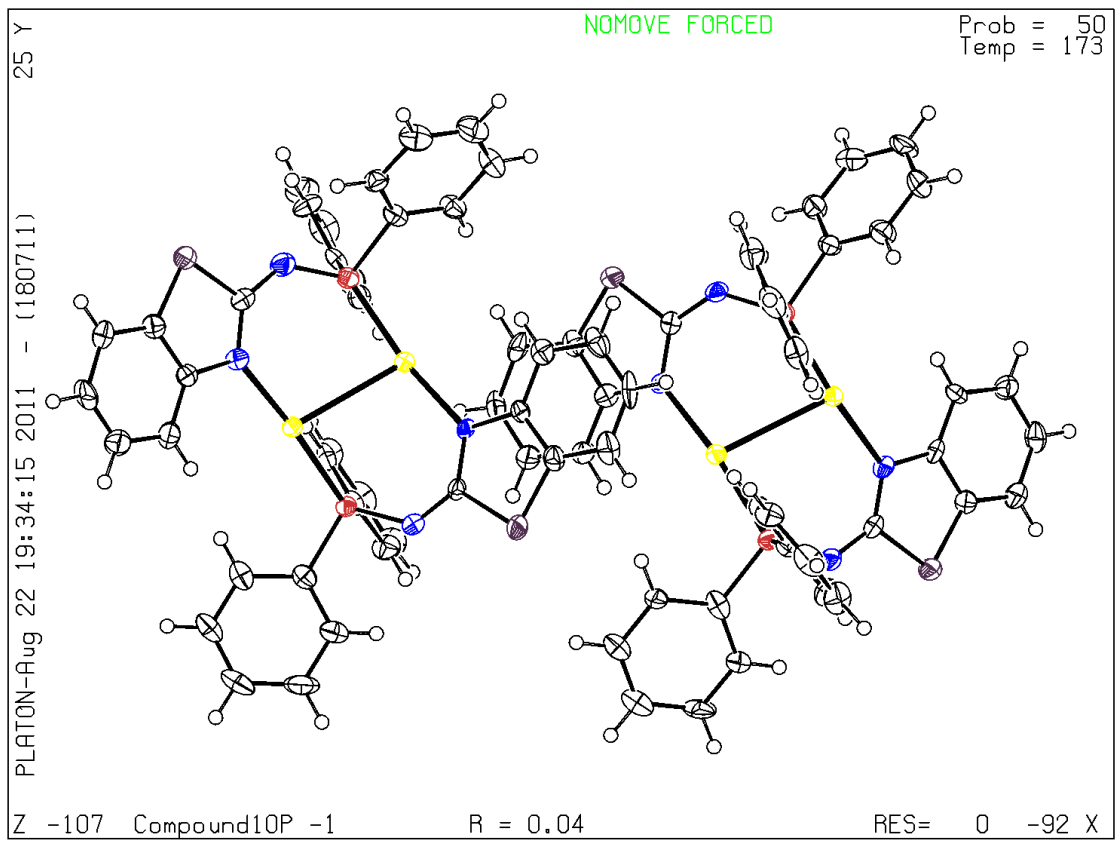

Supplement: mmc1 [file mmc1.pdf]
